# Supplementary material
Source: publisher site journal article supplement (https://www.dovepress.com/article/172732)
Supplement: Supplementary file 1 [file get_supplementary_file.php]

## List of Investigators and Independent Ethics Committees

| Primary Investigator/Address*                                                                                                | Country        | Protocol # - Site # | Sub-Investigators                                                                           | IEC Name and Address                                                                                                                                                                                                                   | Committee Chair/Alternate**       | % of Subjects Randomized/Treated |
|------------------------------------------------------------------------------------------------------------------------------|----------------|---------------------|---------------------------------------------------------------------------------------------|----------------------------------------------------------------------------------------------------------------------------------------------------------------------------------------------------------------------------------------|-----------------------------------|----------------------------------|
| Jan Sperl, M.D.<br>Videnska 1958/9<br>Klinika hepatogastroenterologie<br>Praha 4, 140 21<br>Czech Republic                   | Czech Republic | 5172-077-0001       | Sona Frankova                                                                               | Institut klinicke a experimentalni mediciny (IKFM)<br>Videnska 800<br>Eticka komise IKEM a TN<br>Praha 4 140 59<br>Czech Republic<br>Fakultni nemocnice Brno<br>Jihlavská 20<br>Eticka komise FN Brno<br>Brno 625 00<br>Czech Republic | Vladimir Stanek<br>Sarka Kozakova | 21                               |
| Petr Urbanek, M.D., Ph.D.<br>Jugoslavska 16/567<br>Praha 2, 120 00<br>Czech Republic                                         | Czech Republic | 5172-077-0002       | Zdenek Marecek                                                                              | University Hospital Brno<br>Jihlavská 20<br>Lokální Etická komise FN Brno<br>Brno 625 00<br>Czech Republic<br>Fakultni nemocnice Brno<br>Jihlavská 20<br>Eticka komise FN Brno<br>Brno 625 00<br>Czech Republic                        | Kozakova Sarka<br>Sarka Kozakova  | 11                               |
| Petr Husa, M.D., Ph.D.<br>Jihlavská 20<br>Klinika infekcních chorob<br>Brno, 625 00<br>Czech Republic                        | Czech Republic | 5172-077-0003       | Pavel Slesinger                                                                             | Ethics Committee FN Brno<br>Jihlavská 20<br>Brno 62500<br>Czech Republic<br>Fakultni nemocnice Brno<br>Jihlavská 20<br>Eticka komise FN Brno<br>Brno 625 00<br>Czech Republic                                                          | Sarka Kozakova<br>Sarka Kozakova  | 8                                |
| Petr Kumpel, M.D.<br>Olomoucka 86<br>Infekcni oddeleni<br>Opava, 746 01<br>Czech Republic                                    | Czech Republic | 5172-077-0004       | Ivo Hiemer                                                                                  | Slezska nemocnice v Opave<br>Olomoucka 86<br>Eticka komise<br>Opava 746 01<br>Czech Republic<br>Fakultni nemocnice Brno<br>Jihlavská 20<br>Eticka komise FN Brno<br>Brno 625 00<br>Czech Republic                                      | Marie Zajicova<br>Sarka Kozakova  | 0                                |
| Jan Gerstoff, M.D.<br>Blegdamsvej, 9.<br>Afsnit 8622. Opgang 86 - 2. sal<br>Copenhagen, 2100<br>Denmark                      | Denmark        | 5172-077-0021       | Susanne Dam/Marie Helleberg/Jannik Helweg-Larsen/Ole Kirk/Birgitte Madsen/Frederikke        | De Videnskabssetiske Komiteer For Region Hovedstaden<br>Kongens vaenge 2<br>Regionsgaarden<br>Hillerød 3400<br>Denmark                                                                                                                 | Simon FrancisThomsen              | 3                                |
| Nina Weis, M.D.<br>Kettegaard Alle 30<br>Department of Infectious Diseases. Section 144<br>Hvidovre, 2650<br>Denmark         | Denmark        | 5172-077-0022       | Thomas Lars Benfield/Ann-Britt Eg Hansen/Morten Helms/Gitte Kronborg/Anne-Mette Lebech/Lars | De Videnskabssetiske Komiteer For Region Hovedstaden<br>Kongens Vaenge 2<br>Regionsgaarden<br>Hillerød, Denmark 3400<br>Denmark                                                                                                        | Simon FrancisThomsen              | 3                                |
| Andrzej Horban, M.D., Ph.D.<br>ul. Wolska 37<br>Dział Badan Klinicznych<br>Warszawa, 01-201<br>Poland                        | Poland         | 5172-077-0063       | Hanna Berak/Anna Kolakowska-Rzadzka/Aleksandra Korczyńska/Antoni                            | Komisja Bioetyczna przy Centrum Medycznym Kształcenia Podyplomowego, Marymoncka 99/103 Street, Warsaw 01-813, Poland                                                                                                                   | Ewa Marcinkowska-Suchowierska     | 11                               |
| Waldemar Halota, Prof.<br>ul. sw. Floriana 12<br>Bydgoszcz, 85-030<br>Poland                                                 | Poland         | 5172-077-0064       | Dorota Dybowska/Kornelia Karwowska/Dorota Kozielowicz                                       | Komisja Bioetyczna przy Centrum Medycznym Kształcenia Podyplomowego, Marymoncka 99/103 Street, Warsaw 01-813, Poland                                                                                                                   | Ewa Marcinkowska-Suchowierska     | 11                               |
| Ewa Janczewska<br>ul. Janowska 19<br>Mysłowice, 41-400<br>Poland                                                             | Poland         | 5172-077-0065       | Damian Piotrowski/Arkadiusz Pisuła/Wioleta Warunek                                          | Komisja Bioetyczna przy Centrum Medycznym Kształcenia Podyplomowego, Marymoncka 99/103 Street, Warsaw 01-813, Poland                                                                                                                   | Ewa Marcinkowska-Suchowierska     | 12                               |
| Robert Flisiak, Prof.<br>Zurawia 14<br>Klinika Chorob Zakaznych. Hepatologii UMB<br>Białystok, Podlaskie, 15-540<br>Poland   | Poland         | 5172-077-0067       | Tadeusz Lapinski/Tomasz Szulzyk                                                             | Komisja Bioetyczna przy Centrum Medycznym Kształcenia Podyplomowego, Marymoncka 99/103 Street, Warsaw 01-813, Poland                                                                                                                   | Ewa Marcinkowska-Suchowierska     | 11                               |
| Liliana Gheorghie<br>Sos. Fundeni nr. 252<br>Etaj 4<br>Bucuresti, 022328<br>Romania                                          | Romania        | 5172-077-0105       | Speranta Jacob/Roxana Vadan                                                                 | Comisia Nationala de Bioetica a Medicamentului si a Dispozitivelor Medicale, Sos. Stefan cel Mare nr. 19-21, Bucuresti, 020125, Romania                                                                                                | Dinu Antonescu                    | 7                                |
| Adrian Streinu-Cercel<br>Str. Calistrat Grozovici 1<br>Sectia 2, Pavilion 5 (Sector 2)<br>Bucuresti, 021105<br>Romania       | Romania        | 5172-077-0106       | Victoria NA Arama/Gabriela Ceapraga/Daniela Manolache/Cristina Popescu/Mihaela              | Comisia Nationala de Bioetica a Medicamentului si a Dispozitivelor Medicale, Sos. Stefan cel Mare nr. 19-21, Bucuresti, 020125, Romania                                                                                                | Dinu Antonescu                    | 12                               |
| Adrian Goldis<br>Str. Lucian Blaga nr. 4<br>Timisoara, 300002<br>Romania                                                     | Romania        | 5172-077-0107       | Razvan Diaconescu/Ramon a Amalia Goldis/Mariana                                             | Comisia Nationala de Bioetica a Medicamentului si a Dispozitivelor Medicale, Sos. Stefan cel Mare nr. 19-21, Bucuresti, 020125, Romania                                                                                                | Dinu Antonescu                    | 8                                |
| Ioan Sporea, Prof., DR.<br>Str. Iosif Bulbuca nr. 10<br>Clinica de Gastroenterologie, Etaj 7<br>Timisoara, 300726<br>Romania | Romania        | 5172-077-0108       | Ana Palicsak/Roxana Sirli                                                                   | Comisia Nationala de Bioetica a Medicamentului si a Dispozitivelor Medicale, Sos. Stefan cel Mare nr. 19-21, Bucuresti, 020125, Romania                                                                                                | Dinu Antonescu                    | 5                                |
| Gabriel Moraru                                                                                                               | Romania        | 5172-077-0109       | Mihaela                                                                                     | Comisia Nationala de Bioetica a Medicamentului                                                                                                                                                                                         | Dinu Antonescu                    | 7                                |

|                                                                                                                                                       |           |               |                                                                                       |                                                                                                                                                                                |                         |
|-------------------------------------------------------------------------------------------------------------------------------------------------------|-----------|---------------|---------------------------------------------------------------------------------------|--------------------------------------------------------------------------------------------------------------------------------------------------------------------------------|-------------------------|
| Str. Crisului nr. 2<br>Brasov, 500283<br>Romania                                                                                                      |           |               | Bancu/Maria Elena<br>Cocuz/Rodica<br>Silaghi/Stefan                                   | si a Dispozitivelor Medicale, Sos. Stefan cel Mare<br>nr. 19-21, Bucuresti, 020125, Romania                                                                                    |                         |
| Gabor Horvath,M.D.<br>Egry Jozsef u. 3.<br>T epulet. Foldszint<br>Budapest, 1111<br>Hungary                                                           | Hungary   | 5172-077-0126 | Mihaly Makara                                                                         | Egeszsegugyi Tudomanyos Tanacs<br>Arany Janos u. 6-8.<br>Klinikai Farmakologiai Etikai Bizottsaga (ETT<br>KFEB)<br>Budapest 1051<br>Hungary                                    | Zsuzsanna Furst<br>20   |
| Bela Hunyady,Prof.<br>Tallian Gy. u. 20-32<br>Belgyogyszat<br>Kaposvar, 7400<br>Hungary                                                               | Hungary   | 5172-077-0127 | Attila Haragh/Bela<br>Hunyady/Zsolt<br>Szinku                                         | Egeszsegugyi Tudomanyos Tanacs<br>Arany Janos u. 6-8.<br>Budapest 1051<br>Hungary                                                                                              | Zsuzsanna Furst<br>5    |
| Klara Werling<br>Szentkiralyi u. 46.<br>II. Belgyogyszati Klinika<br>Budapest, 1088<br>Hungary                                                        | Hungary   | 5172-077-0128 | None                                                                                  | Egeszsegugyi Tudomanyos Tanacs<br>Arany Janos u. 6-8.<br>Budapest 1051<br>Hungary                                                                                              | Zsuzsanna Furst<br>6    |
| Anna Tusnadi,M.D.<br>Toszegi ut 21.<br>Infektologiai Osztaly. K epulet Fsz<br>Szolnok, 5004<br>Hungary                                                | Hungary   | 5172-077-0129 | Timea Ecseki/Anna<br>Tusnadi                                                          | Egeszsegugyi Tudomanyos Tanacs<br>Arany Janos u. 6-8.<br>Budapest 1051<br>Hungary                                                                                              | Zsuzsanna Furst<br>6    |
| Ligita Jancoriene,Ph.D.<br>Birutes g. 1<br>Konsultaciju ir imunoprofilaktikos skyrius<br>Vilnius, 08117<br>Lithuania                                  | Lithuania | 5172-077-0147 | Alina Voinic                                                                          | Lietuvos Bioetikos Komitetas<br>Didzioji g. 22<br>Vilnius LT-01128<br>Lithuania                                                                                                | Eugenijus Gefenas<br>12 |
| Jolita Jakutiene,M.D.<br>Santarkiu g. 2<br>Klinikines farmakologijos skyrius<br>Vilnius, 08661<br>Lithuania                                           | Lithuania | 5172-077-0148 | Arida<br>Buivydiene/Edita<br>Kazanaitis                                               | Lietuvos Bioetikos Komitetas<br>Didzioji g. 22<br>Vilnius LT-01128<br>Lithuania                                                                                                | Eugenijus Gefenas<br>11 |
| Limas Kupcinskas,Prof., DR., Med.<br>Eiveniu g. 2<br>Gastroenterologijos klinika<br>Kaunas, 50009<br>Lithuania                                        | Lithuania | 5172-077-0149 | Jurate                                                                                | Lietuvos Bioetikos Komitetas<br>Didzioji g. 22<br>Vilnius LT-01128<br>Lithuania                                                                                                | Eugenijus Gefenas<br>10 |
| Aukse Mickiene,Prof., DR., Med.<br>Josvainiu g. 2<br>Infekciniu ligu klinika<br>Kaunas, LT - 47144<br>Lithuania                                       | Lithuania | 5172-077-0150 | Violeta                                                                               | Lietuvos Bioetikos Komitetas<br>Didzioji g. 22<br>Vilnius LT-01128<br>Lithuania                                                                                                | Eugenijus Gefenas<br>5  |
| Maria de los Angeles Castro Iglesias,DR.<br>As Xubias de Arriba, 84<br>Servicio de Medicina Interna B<br>A Coruna, 15006<br>Spain                     | Spain     | 5172-077-0168 | Alvaro Mena de<br>Cea/Berta Pernas<br>Souto/Iria<br>Rodriguez Osorio                  | SER GAS<br>C/ San Lazaro, s/n<br>Edificio Administrativo. Servicio Galego de<br>Saude (SER GAS)<br>Santiago de Compostela 15703<br>Spain                                       | Alvaro Castro<br>7      |
| Yolanda Real Martinez,DR.<br>C/Diego de Leon, 62<br>Servicio de Aparato Digestivo. Hepatologia. Planta<br>3<br>Madrid, 28006<br>Spain                 | Spain     | 5172-077-0169 | Leticia Gonzalez<br>Moreno/Dolores<br>Ochoa<br>Mazarro/Yolanda<br>Real Martinez       | CEIC Hospital Universitario La Princesa, C/Diego<br>De Leon, Madrid 28006, Spain                                                                                               | Patricia Torres<br>5    |
| Juan Ignacio Arenas Ruiz-Tapiador<br>Paseo Dr. Beguiristain, s/n<br>Servicio de Digestivo. Planta 3<br>San Sebastian, 20014<br>Spain                  | Spain     | 5172-077-0170 | Francisco Javier<br>Esandi<br>Gonzalez/Alexandra<br>Gomez<br>Garcia/Leticia<br>Martin | Comite Etico de Investigacion Clinica Regional<br>Pais Vasco<br>Calle Donostia San Sebastian, 1<br>Departamento de Sanidad del Gobierno Vasco<br>Vitoria, Alava 01010<br>Spain | Patricia Torres<br>9    |
| Rafael Alexander Modahl Leiva<br>Jonas Lies vei 65<br>Infeksjonsmedisinsk avdeling<br>Bergen, 5021<br>Norway                                          | Norway    | 5172-077-0189 | None                                                                                  | Postboks 1130, Blindern, Oslo 0318, Norway                                                                                                                                     | Grete Dyb<br>5          |
| Hege Kileng/Hege Kileng<br>Sykehusveien 38<br>Gastromedisinsk avdeling<br>Tromsoe, 9038<br>Norway                                                     | Norway    | 5172-077-0190 | Jon Florholmen                                                                        | Postboks 1130, Blindern, Oslo 0318, Norway                                                                                                                                     | Grete Dyb<br>6          |
| Bligehan Aygen<br>Erciyes UTF<br>Enfeksiyon ve Klinik Mikrobiyoloji ABD<br>Kayseri, 38039<br>Turkey                                                   | Turkey    | 5172-077-0231 | Orhan Yildiz                                                                          | Kocaeli University Faculty of Medicine Ethics<br>Committee, Kocaeli Universitesi Tip Fakultesi<br>KABI, Umuttepe, Kocaeli, 41380, Turkey                                       | Ersoy, Nermin<br>4      |
| Osman Yuksel,Prof., DR./Seyfettin Koklu,DR., Med.<br>Hacettepe Univ Tip Fak Ic Hast ABD<br>Gastroenteroloji Bolumu Sihhiye<br>Ankara, 06100<br>Turkey | Turkey    | 5172-077-0232 | Seyfettin Koklu                                                                       | Kocaeli University Faculty of Medicine Ethics<br>Committee, Kocaeli Universitesi Tip Fakultesi<br>KABI, Umuttepe, Kocaeli, 41380, Turkey                                       | Ersoy, Nermin<br>7      |
| Sila Akhan Cetin<br>Kocaeli Univ. Kampusu<br>Umut Tepe Yerleskesi. Enfeksiyon Hastalıkları BD.<br>Kocaeli, 41380<br>Turkey                            | Turkey    | 5172-077-0233 | Salih Cakiroglu                                                                       | Kocaeli University Faculty of Medicine Ethics<br>Committee, Kocaeli Universitesi Tip Fakultesi<br>KABI, Umuttepe, Kocaeli, 41380, Turkey                                       | Ersoy, Nermin<br>3      |
| Altay Celebi<br>Kocaeli UTF Gastroenteroloji ABD<br>Umuttepe Yerleskesi<br>Kocaeli, 41380<br>Turkey                                                   | Turkey    | 5172-077-0234 | Omer<br>Senturk/Hasan<br>Yilmaz                                                       | Kocaeli University Faculty of Medicine Ethics<br>Committee, Kocaeli Universitesi Tip Fakultesi<br>KABI, Umuttepe, Kocaeli, 41380, Turkey                                       | Ersoy, Nermin<br>3      |
| Mustafa Kemal Celen,Prof., DR., Med.<br>Dicle UTF Enfeksiyon Hastalıkları ve klinik<br>Mikrobiyoloji ABD<br>Diyarbakir, 21280                         | Turkey    | 5172-077-0235 | Celal Ayaz                                                                            | Kocaeli University Faculty of Medicine Ethics<br>Committee, Kocaeli Universitesi Tip Fakultesi<br>KABI, Umuttepe, Kocaeli, 41380, Turkey                                       | Ersoy, Nermin<br>3      |

Turkey

\* If the original investigator has been replaced, that investigator's name is followed by a slash (/) and the replacement investigator's name.  
\*\* Names of individual IEC members available upon request.
